## Suppurative *Acinetobacter baumannii* Thyroiditis with Bacteremic Pneumonia: Case Report and Review

Eugene Hsin Yu, Wen-Chien Ko, Yin-Ching Chuang, and Ta-Jen Wu

From the Division of Endocrinology and Metabolism and Division of Infectious Diseases, Department of Internal Medicine, National Cheng Kung University Hospital, Tainan, Taiwan, Republic of China

Suppurative thyroiditis is rare, and the major pathogens are *Staphylococcus* and *Streptococcus* species. We present a case caused by *Acinetobacter baumannii*, which has never before been reported. We review another 191 cases from the English-language literature (1980 to April 1997) and make a comparison with a review of 224 cases (1900–1980). As the numbers of immunocompromised patients increase, cases of suppurative thyroiditis are increasing. *Pneumocystis carinii* has become an important pathogen. Most patients (83.1%) with bacterial infections were euthyroid, whereas those with fungal or mycobacterial infections tended to be hypothyroid (62.5%) and hyperthyroid (50%), respectively.

According to the etiology and clinical course, thyroiditis is divided into three categories: suppurative thyroiditis (mostly acute), subacute thyroiditis (including de Quervain's thyroiditis and subacute lymphocytic thyroiditis), and chronic thyroiditis (Hashimoto's thyroiditis). The latter two categories are common diseases and are caused by a viral infection and an autoimmune process, respectively. On the contrary, suppurative thyroiditis is rare. Berger et al. reviewed 224 cases characterized by abscess formation and/or demonstration of microorganisms in the thyroid gland that were reported in the English-language literature from 1900 to 1980 [1]. In that era, the major pathogens were *Staphylococcus* and *Streptococcus* species.

We report a case of suppurative *Acinetobacter baumannii* thyroiditis with bacteremic pneumonia, which, to the best of our knowledge, has never been reported. Moreover, we review the English-language literature from 1980 to April 1997. The comparisons of age/sex distribution, underlying diseases, pathogens, results of thyroid function/scan, and fatality rate are made between these cases and those reviewed by Berger et al.

### Case Report

A 70-year-old man who was a heavy smoker with mild obstructive lung disease had right-flank soreness for 2 days, followed by severe neck pain, fever, and chills. Physical examination revealed a body temperature of 38.5°C and an erythematous nonfluctuant mass over the right lobe of the thyroid.

The significant laboratory findings included a WBC count of 13,900/mm<sup>3</sup> (13% band forms, 83% neutrophils); 6–8 RBCs

per high-power field (HPF) and 8–10 WBCs/HPF in urine; a T<sub>4</sub> (thyroxine) level of 12.2 µg/dL (normal, 4.5–12.5 µg/dL); a T<sub>3</sub> (triiodothyronine) level of 106.3 ng/dL (80–187 ng/dL); a TSH (thyroid-stimulating hormone) level of 0.24 µU/mL (0.5–5.6 µU/mL); negative HIV screening; and numerous polymorphonuclear leukocytes in a thyroid aspirate (5 mL).

The chest radiograph showed hyperinflated lungs, and a radiograph of the abdomen revealed right ureter stones with hydronephrosis. Both sonography of the thyroid and CT of the neck showed a hypodense/heterogeneous hypoechoic lesion (3.7 cm × 2.7 cm) in the right lobe of the thyroid, but there was no evidence of thyroglossal duct remnants. The iodine 131 (<sup>131</sup>I) thyroid scan and the technetium 99m (<sup>99m</sup>Tc) sodium pertechnetate neck scan showed no uptake in the thyroid beds. Under the impression of the occurrence of suppurative thyroiditis, we used parenteral ampicillin/sulbactam and gentamicin initially until both blood and thyroid aspirate cultures revealed *A. baumannii* growth. At that time the antibiotics were changed to ciprofloxacin and amikacin.

Two weeks later, the chest radiograph showed multiple pneumonic patches with only normal flora in the sputum. The gallium 67 citrate (<sup>67</sup>Ga) scan showed accumulation of the radio-tracer bilaterally in the lower lobes of the lungs (but no uptake in the thyroid). No pathogens were cultured from specimens from the right collecting system (obtained via retrograde pyelography) or from the initial urine specimen obtained on arrival.

By repeated aspiration of the thyroid and 5 weeks' parenteral ciprofloxacin treatment, the patient's condition improved. The thyroid lesion shrank (to 1.6 × 1.0 cm), and the pneumonic patches resolved. After discharge, the esophagogram showed no evidence of pyriform sinus fistulae. Although the origin of *A. baumannii* was undetermined, there was a high suspicion for a urinary tract origin.

### Literature Review

A MEDLINE search of the English-language literature (1980 to April 1997) for contemporary case reports of suppurative thy-

Received 9 March 1998; revised 16 July 1998.

Reprints or correspondence: Dr. Ta-Jen Wu, Division of Endocrinology and Metabolism, Department of Internal Medicine, National Cheng Kung University Hospital, 138 Sheng Li Road, Tainan, Taiwan, Republic of China.

Clinical Infectious Diseases 1998;27:1286–90

© 1998 by the Infectious Diseases Society of America. All rights reserved.  
1058-4838/98/2705-0027\$03.00

**Table 1.** Comparison of pathogens in the review of Berger et al. [1] and the present literature review (including present case).

| Pathogen                                    | No. of cases in present review |               |       | No. of cases in review by Berger et al. |               |       |
|---------------------------------------------|--------------------------------|---------------|-------|-----------------------------------------|---------------|-------|
|                                             | Pure culture                   | Mixed culture | Total | Pure culture                            | Mixed culture | Total |
| Gram (+) aerobic bacterium                  |                                |               |       |                                         |               |       |
| <i>Streptococcus</i> species                | 14                             | 14            | 28    | 31                                      | 5             | 38    |
| <i>Staphylococcus</i> species               | 18                             | 1             | 19    | 20                                      | 6             | 26    |
| <i>Corynebacterium diphtheroides</i>        | 0                              | 1             | 1     |                                         |               | 0     |
| <i>Enterococcus</i>                         | 1                              | 0             | 1     |                                         |               | 0     |
| Gram (+) cocci, not specified               | 0                              | 1             | 1     |                                         |               | 0     |
| <i>Nocardia asteroides</i>                  | 1                              | 0             | 1     |                                         |               | 0     |
| Gram (-) aerobic bacterium                  |                                |               |       |                                         |               |       |
| Enterobacteriaceae                          |                                |               |       |                                         |               |       |
| <i>Salmonella</i> species                   | 5                              | 0             | 5     | 40                                      | 0             | 40    |
| <i>Escherichia coli</i>                     | 5                              | 0             | 5     |                                         |               |       |
| <i>Klebsiella pneumoniae</i>                | 4                              | 0             | 4     |                                         |               |       |
| <i>Acinetobacter baumannii</i>              | 1                              | 0             | 1     |                                         |               |       |
| <i>Acinetobacter</i> species                | 0                              | 1             | 1     |                                         |               |       |
| Other, not specified                        |                                |               |       | 6                                       | 2             | 8     |
| <i>Pseudomonas aeruginosa</i>               | 5                              | 0             | 5     | 1                                       | 0             | 1     |
| <i>Haemophilus influenzae</i>               | 1                              | 1             | 2     | 2                                       | 0             | 2     |
| HACEK group                                 |                                |               |       |                                         |               |       |
| <i>Haemophilus parainfluenzae</i>           | 0                              | 1             | 1     |                                         |               | 0     |
| <i>Actinobacillus actinomycetemcomitans</i> | 0                              | 0             | 0     | 1                                       | 0             | 1     |
| <i>Eikenella corrodens</i>                  | 2                              | 2             | 4     |                                         |               | 0     |
| <i>Brucella</i> species                     | 3                              | 0             | 3     |                                         |               | 0     |
| Gram (-) rods, not specified                | 0                              | 1             | 1     |                                         |               | 0     |
| Gram (+) anaerobic bacterium                |                                |               |       |                                         |               |       |
| <i>Peptostreptococcus</i> species           | 4                              | 0             | 4     |                                         |               | 0     |
| <i>Clostridium septicum</i>                 |                                |               | 0     | 1                                       | 0             | 1     |
| <i>Actinomyces</i> species                  |                                |               |       | 2                                       | 0             | 2     |
| Gram (-) anaerobic bacterium                |                                |               |       |                                         |               |       |
| <i>Fusobacterium</i> species                | 0                              | 4             | 4     |                                         |               | 0     |
| <i>Bacteroides fragilis</i>                 | 0                              | 1             | 1     |                                         |               | 0     |
| <i>Bacteroides distasonis</i>               | 0                              | 1             | 1     |                                         |               | 0     |
| <i>Bacteroides melaninogenicus</i>          | 0                              | 1             | 1     |                                         |               | 0     |
| Other anaerobe, not specified               | 1                              | 4             | 5     | 5                                       | 3             | 8     |
| Fungus                                      |                                |               |       |                                         |               |       |
| <i>Pneumocystis carinii</i>                 | 16                             | 0             | 16    |                                         |               | 0     |
| <i>Aspergillus</i> species                  | 0                              | 0             | 0     |                                         |               | 26*   |
| <i>Candida</i> species                      | 3                              | 0             | 3     |                                         |               | 1     |
| <i>Coccidioides immitis</i>                 | 0                              | 0             | 0     |                                         |               | 3     |
| <i>Allescheria boydii</i>                   | 0                              | 0             | 0     |                                         |               | 1     |
| Mycobacterium                               | 12                             | 0             | 12    |                                         |               | 21    |
| Gumma                                       | 0                              | 0             | 0     |                                         |               | 6     |
| Parasite                                    | 0                              | 0             | 0     |                                         |               | 11†   |

NOTE. HACEK = *Haemophilus*, *Actinobacillus*, *Cardiobacterium*, *Eikenella*, and *Kingella*.

\* Almost all the diagnoses were made postmortem.

† The parasites included *Echinococcus granulosus* and *Cysticercus* species.

roiditis was done with use of the key words *thyroiditis* and *suppurative*. In addition, the references of these papers were reviewed for additional cases. There is confusion about possible duplication of cases in two publications [2, 3]. The comparisons of the gender, underlying diseases, and pathogens between the older (>20 years) and younger patients were made by means of  $\chi^2$  analysis.

Some descriptions used in the interpretation of thyroid function were not clear, e.g., patients were noted to be "euthyroid" [2-4] or "clinically euthyroid" [5, 6] without mention of serum FT<sub>4</sub> (free thyroxine), FT<sub>4</sub>I (free thyroxine index), T<sub>4</sub>, or TSH data. According to the values of serum T<sub>4</sub>, FT<sub>4</sub>, FT<sub>4</sub>I, and TSH, we classified the thyroid function into five groups:

**Table 2.** Summary of thyroid function in patients with suppurative thyroiditis, compiled from the literature and the present case.

| Characteristic                                | Bacterium<br>(n = 53) | Fungus<br>(n = 16) | Mycobacterium<br>(n = 4) | No<br>growth<br>(n = 12) | No<br>mention<br>(n = 10) | Total<br>(n = 95) |
|-----------------------------------------------|-----------------------|--------------------|--------------------------|--------------------------|---------------------------|-------------------|
| Euthyroid                                     | 10 (18.9)             | 0 (0)              | 0 (0)                    | 1 (8.3)                  | 6 (60)                    | 17 (17.9)         |
| Hyperthyroid                                  | 6 (11.3)              | 3 (18.8)           | 2 (50)                   | 0 (0)                    | 0 (0)                     | 11 (11.6)         |
| Hypothyroid                                   | 3 (5.7)               | 10* (62.5)         | 1 (25)                   | 1 (8.3)                  | 1 (10)                    | 16 (16.8)         |
| Euthyroid sick<br>syndrome                    | 3 (5.7)               | 0 (0)              | 0 (0)                    | 0 (0)                    | 0 (0)                     | 3 (3.2)           |
| “Euthyroid” by authors<br>(no data mentioned) | 31 (58.5)             | 3 (18.8)           | 1 (25)                   | 10 (83.3)                | 3 (30)                    | 48 (50.5)         |

NOTE. Data are no. (%) of patients.

\* One patient had persistent hypothyroidism [22].

euthyroid, hyperthyroid, hypothyroid, euthyroid sick syndrome, and euthyroid by authors without data mentioned.

## Discussion

Suppurative thyroiditis is rare because of the rich vascular/lymphatic supply, a well-developed fascial encapsulation, and the high iodine content of the thyroid gland [7–9]. Clinical manifestations include fever, chills, neck pain, neck mass, dysphagia, and local erythema with heat. We reviewed 191 cases from the period of 1980 to April 1997 [2–6, 10–67]. The disease could occur in any age and occurred equally in both sexes, with a female/male (F/M) ratio of 49.7%/50.3% in both our review and that of Berger et al.

Of the 150 cases involving documented underlying diseases, 106 (70.7%) had diseases or structural abnormalities of the thyroid (e.g., pyriform sinus fistula, goiter, nodule, thyroglossal duct, and thyroid carcinoma). The finding is similar to that in the review of Berger et al., in which 61% of bacterium-infected patients had a history of underlying thyroid disease, especially goiter. The immunocompromised status played the second most important role (36 cases; 24%). Of them, 18 patients had AIDS, 4 had lymphoma/leukemia, and 4 had tuberculosis. More patients under 20 years old had pyriform sinus fistulae (18 of 32 vs. 11 of 66 over 20 years old;  $P < .05$ ) and were more susceptible to bacterial infection (9 of 32 vs. 3 of 66;  $P < .05$ ). In contrast, the older patients tended to be immunocompromised (32 of 66 vs. 4 of 32;  $P < .05$ ), especially by AIDS (18 of 66 vs. 0 of 32;  $P < .05$ ).

The most common pathogens were *Streptococcus*, *Staphylococcus*, *Pneumocystis carinii*, and *Mycobacterium* species (table 1). By 1951, 40 cases of salmonella thyroiditis had been reported [68], although it is no longer common now. The reason why 26 patients had aspergillus infection in the review of Berger et al. (almost all by postmortem diagnoses) but none did in ours is that no autopsy studies are described in recent case reports. With greater use of immunosuppressive therapies today, we believe the incidence of infection is underestimated.

Unusual pathogens often occurred with immunocompromised status or special contact histories. *P. carinii* [10–20], *Klebsiella pneumoniae* [2], *Candida* [21–23], and *Brucella melitensis* [24, 25] occurred exclusively in patients with AIDS, diabetes mellitus, leukemia, and persons who had contact with goats or goat milk, respectively. Ten patients (including ours; 17–88 years old, including 7 males and 3 of unknown sex) had coexistent bacteremia or fungemia. Among them, two patients had leukemia and one had both diabetes and pulmonary tuberculosis. *Candida albicans* [21, 22], *Escherichia coli* [3, 26], and *Salmonella typhi* [27] occurred in two cases each; *Staphylococcus aureus* [28], *B. melitensis* [25], *K. pneumoniae* [3], and *A. baumannii* (present case) were cultured in one case each.

It is difficult to assess thyroid function in the review of Berger et al. [1]. Our patient, clinically euthyroid, had a high-normal serum T<sub>4</sub> concentration, a mildly suppressed TSH value, and low I<sup>131</sup> and <sup>99m</sup>Tc uptakes. The results were compatible with hyperthyroidism due to thyroid tissue destruction. We reviewed the thyroid function in 95 cases (table 2). Most patients (83.1%) with bacterial infections were euthyroid (including euthyroid sick syndrome). The fungus-infected patients tended to be hypothyroid (62.5%), and one patient with a candida infection needed persistent thyroid hormone replacement [22]. Those who had mycobacterial infections had a propensity (50%) to be hyperthyroid.

In the study of Berger et al. [1], 90% of bacterial infections and 78% of mycobacterial infections had cold nodules revealed by radionuclide thyroid scan. In our review, <sup>123</sup>I, <sup>125</sup>I, <sup>131</sup>I, <sup>99m</sup>Tc, and <sup>201</sup>Tl (thallium 201) radionuclear scans showed cold nodules (no uptake) in the majority of cases (95.3%). <sup>67</sup>Ga scans were done in 4 cases, and 3 showed increased uptake [21, 22, 29] whereas 1 did not (our patient). An <sup>111</sup>In (indium 111) WBC scan was done in one case to demonstrate that the infectious focus was the thyroid [30].

Risk factors for community-acquired acinetobacter infections include alcoholism, smoking, renal failure, pulmonary diseases, previous antibiotic use, and malignancies [31]. As a

heavy smoker with obstructive lung disease and nephrolithiasis, our patient was prone to acinetobacter infections. Among the common routes of entry of suppurative thyroiditis (pyriform sinus fistulae, remnants of the thyroglossal duct, bloodstream, lymphatics, direct penetrating trauma, and invasion from contiguous structures [7, 69–73]), hematogenous spread from the right collecting system might explain the patient's course.

The management of suppurative thyroiditis includes antimicrobial therapy, incision/drainage, and surgical excision. We used parenteral ciprofloxacin and amikacin [74], along with repeated pus aspiration. The result was satisfactory. The fatality rate associated with suppurative thyroiditis was 12.1% in the review by Berger et al. (11 of 127 bacterial, 11 of 19 fungal, 3 of 17 mycobacterial, 1 of 6 gummatous, and 1 of 10 parasitic infections). In our review, 7 (3.7%) of 191 patients died. Five of them had AIDS and were infected with *P. carinii* [10–12, 18], one had esophageal cancer with *Streptococcus milleri* and mixed anaerobic infection [32], and one had a *Pseudomonas aeruginosa* infection with an unmentioned underlying disease [33].

## Conclusion

As the number of immunocompromised patients increases, cases of suppurative thyroiditis are increasing. Many pathogens are of an opportunistic nature, and *P. carinii* has become an important pathogen. It is reasonable to keep this disease in mind with regard to patients with immune disorder. When the disease is accompanied by hypothyroidism or hyperthyroidism, fungal and mycobacterial origins should be considered, respectively.

## References

- Berger SA, Zonszein J, Villamena P, Mittman N. Infectious diseases of the thyroid gland. *Rev Infect Dis* 1983;5:108–18.
- Jeng LB, Lin JD, Chen MF. Acute suppurative thyroiditis: a ten-year review in a Taiwanese hospital. *Scand J Infect Dis* 1994;26:297–300.
- Lin JD, Huang BY, Huang HS, Juang JH, Jeng LB. Ultrasonography and fine needle aspiration cytology of acute suppurative thyroiditis. *Chang Gung Med J* 1993;16:93–8.
- Kodama T, Ito Y, Obara T, Fujimoto Y. Acute suppurative thyroiditis in appearance of unusual neck mass. *Endocrinol Jpn* 1987;34:427–30.
- Bajpai M, Rohatgi M, Gupta DK, Padhy AK. Acute suppurative thyroiditis in children. *Indian J Pediatr* 1992;59:127–9.
- Rich EJ, Mendelman PM. Acute suppurative thyroiditis in pediatric patients [review]. *Pediatr Infect Dis J* 1987;6:936–40.
- Burhans EC. Acute thyroiditis: a study of sixty-seven cases. *Surg Gynecol Obstet* 1928;47:478–88.
- Williamson GS. The applied anatomy and physiology of the thyroid apparatus. *Br J Surg* 1926;13:466–96.
- Thompson L. Syphilis of the thyroid. *Am J Syphilis* 1917;1:179–91.
- Danahey DG, Kelly DR, Forrest LA. HIV-related *Pneumocystis carinii* thyroiditis: a unique case and literature review. *Otolaryngol Head Neck Surg* 1996;114:158–61.
- Hardy WD, Northfelt DW, Drake TA. Fatal, disseminated pneumocystosis in a patient with acquired immunodeficiency syndrome receiving prophylactic aerosolized pentamidine. *Am J Med* 1989;87:329–31.
- McCarty M, Coker R, Claydon E. Case report: disseminated *Pneumocystis carinii* infection in a patient with the acquired immune deficiency syndrome causing thyroid gland calcification and hypothyroidism. *Clin Radiol* 1992;45:209–10.
- Raviglione MC. Extrapulmonary pneumocystosis: the first 50 cases. *Rev Infect Dis* 1990;12:1127–38.
- Waltz AE, Pitchon HE. *Pneumocystis carinii* in FNA of the thyroid. *Diagn Cytopathol* 1991;7:615–7.
- Drucker DJ, Bailey D, Rotstein L. Thyroiditis as the presenting manifestation of disseminated *Pneumocystis carinii* infection. *J Clin Endocrinol Metab* 1990;71:1663–5.
- Gallant JE, Enriquez RE, Cohen KL, Hammers LW. *Pneumocystis carinii* thyroiditis. *Am J Med* 1988;84:303–6.
- Battan R, Maruiz P, Raviglione MC, et al. *Pneumocystis carinii* infection of the thyroid in a hypothyroid patient with AIDS: diagnosis by fine needle aspiration biopsy. *J Clin Endocrinol Metab* 1991;72:724–6.
- Guttler R, Singer PA, Axline SG, et al. *Pneumocystis carinii* thyroiditis: report of three cases and review of the literature [review]. *Arch Intern Med* 1993;153:393–6; published erratum appears in *Arch Intern Med* 1993;153:1002.
- Ragni MV, Dekker A, DeRubertis FR, et al. *Pneumocystis carinii* infection presenting as necrotizing thyroiditis and hypothyroidism. *Am J Clin Pathol* 1991;95:489–93.
- Spitzer RD, Chan JC, Marks JB, et al. Case report: hypothyroidism due to *Pneumocystis carinii* thyroiditis in a patient with acquired immunodeficiency syndrome. *Am J Med Sci* 1991;302:98–100.
- Gandhi RT, Tollin SR, Seely EW. Diagnosis of candida thyroiditis by fine needle aspiration. *J Infect* 1994;28:77–81.
- Bach MC, Blattner S. Occult candida thyroid abscess diagnosed by gallium-67 scanning. *Clin Nucl Med* 1990;15:395–6.
- Fernandez JF, Anaissie EF, Vassilopoulou-Sellin R, Samaan NA. Acute fungal thyroiditis in a patient with acute myelogenous leukemia. *J Intern Med* 1991;230:539–41.
- Mousa AR, al-Mudallal DS, Marafe A. Brucella thyroiditis [letter]. *J Infect* 1989;19:287–8.
- Von Graevenitz A, Colla F. Thyroiditis due to *Brucella melitensis*: report of 2 cases. *Infection* 1990;18:179–80.
- Andres JC, Nagalla R. Acute bacterial thyroiditis secondary to urosepsis. *J Am Board Fam Pract* 1995;8:128–9.
- Nmadu PT. Infective thyroiditis in northern Nigeria: a fifteen-year study. *East Afr Med J* 1989;66:748–51.
- Evengard B, Julander I. Suppurative *Staphylococcus aureus* thyroiditis. *Scand J Infect Dis* 1986;18:483–5.
- Kawanaka M, Sugimoto Y, Suehiro M, Fukuchi M. Thyroid imaging in a typical case of acute suppurative thyroiditis with abscess formation due to infection from a persistent thyroglossal duct. *Ann Nucl Med* 1994;8:159–62.
- Pounds TR, Hattner RS. Surprise struma: suppurative thyroiditis found by In-111 WBC imaging. *Clin Nucl Med* 1993;18:1089.
- Alen DM, Hartman BJ. *Acinetobacter* species. In: Mandell GL, Douglas RG Jr, Bennett JE, eds. Principles and practice of infectious diseases. 3rd ed. New York: Churchill Livingstone, 1990:1696–700.
- Premawardhana LD, Vora JP, Scanlon MF. Suppurative thyroiditis with oesophageal carcinoma. *Postgrad Med J* 1992;68:592–3.
- Singh SK, Agrawal JK, Kumar M, Shukla HS. Fine needle aspiration cytology in the management of acute suppurative thyroiditis. *Ear Nose Throat J* 1994;73:415–7.
- Lough DR, Ramadan HH, Aronoff SC. Acute suppurative thyroiditis in children. *Otolaryngol Head Neck Surg* 1996;114:462–5.
- Lecuit M, Caumes E, Bricaire F, Gatineau M, Menegaux F, Gentilini M. Acute suppurative *Salmonella enteritidis* thyroiditis associated with tyrotoxicosis in a patient infected with the human immunodeficiency virus [letter]. *Clin Infect Dis* 1995;20:196.
- Schneider U, Birnbacher R, Schick S, Ponthold W, Schober E. Recurrent suppurative thyroiditis due to pyriform sinus fistula: a case report. *Eur J Pediatr* 1995;154:640–2.

37. Robillon JF, Sadoul JL, Guerin P, et al. *Mycobacterium avium intracellulare* suppurative thyroiditis in a patient with Hashimoto's thyroiditis. *J Endocrinol Invest* **1994**;17:133-4.
38. Yamashita J, Ogawa M, Yamashita S, Saishoji T, Nomura K, Tsuruta J. Acute suppurative thyroiditis in an asymptomatic woman: an atypical presentation simulating thyroid carcinoma. *Clin Endocrinol* **1994**;40:145-50.
39. Chiovato L, Canale G, Maccherini D, Falcone V, Pacini F, Pinchera A. *Salmonella brandenburg*: a novel cause of acute suppurative thyroiditis. *Acta Endocrinologica* **1993**;128:439-42.
40. Lewin SR, Street AC, Snider J. Suppurative thyroiditis due to *Nocardia asteroides* [letter, comment]. *J Infect* **1993**;26:339-40.
41. Nonomura N, Ikarashi F, Fujisaki T, Nakano Y. Surgical approach to pyriform sinus fistula. *Am J Otolaryngol* **1993**;14:111-5.
42. Patel A, Sowden D, Kemp R, D'Emden M, Perry-Keene D. Pneumocystis thyroiditis [letter]. *Med J Aust* **1992**;156:136-7.
43. Poelman M, Benoit Y, Laureys G, Craen M, Leroy J. Acute suppurative thyroiditis complicating second allogeneic transplant for juvenile CMMML. *Bone Marrow Transplant* **1992**;10:547-8.
44. Walsh CH, Dunne C. Hyperthyroidism associated with acute suppurative thyroiditis. *Ir J Med Sci* **1992**;161:137.
45. Nieuwland Y, Tan KY, Elte JW. Miliary tuberculosis presenting with thyrotoxicosis. *Postgrad Med J* **1992**;68:677-9.
46. Das DK, Pant CS, Chachra KL, Gupta AK. Fine needle aspiration cytology diagnosis of tuberculous thyroiditis. A report of eight cases. *Acta Cytol* **1992**;36:517-22.
47. Miyauchi A, Matsuzuka F, Kuma K, Takai S. Piriform sinus fistula: an underlying abnormality common in patients with acute suppurative thyroiditis. *World J Surg* **1990**;14:400-5.
48. Fule RP, Saoji AM. Isolation of *Salmonella paratyphi* A from thyroid abscess—a case report. *Indian J Med Sci* **1989**;43:95-6.
49. Sachs MK, Dickinson G, Amazon K. Tuberculous adenitis of the thyroid mimicking subacute thyroiditis. *Am J Med* **1988**;85:573.
50. Elias AN, Kyaw T, Winikoff J, Gwinup G. Acute suppurative thyroiditis. *J Otolaryngol* **1985**;14:17-9.
51. Schweitzer VG, Olson NR. Thyroid abscess. *Otolaryngol Head Neck Surg* **1981**;89:226-9.
52. Rossiter JL, Topf P. Acute suppurative thyroiditis with bilateral piriform sinus fistulae. *Otolaryngol Head Neck Surg* **1991**;105:625-8.
53. Skuza K, Rapaport R, Fieldman R, Goldstein S, Marquis J. Recurrent acute suppurative thyroiditis [review]. *J Otolaryngol* **1991**;20:126-9.
54. Har-el G, Sasaki CT, Prager D, Krespi YP. Acute suppurative thyroiditis and the bronchial apparatus. *Am J Otolaryngol* **1991**;12:6-11.
55. Lucaya J, Berdon WE, Enriquez G, Regas J, Carreno JC. Congenital pyriform sinus fistula: a cause of acute left-sided suppurative thyroiditis and neck abscess in children [see comments]. *Pediatr Radiol* **1990**;21:27-9.
56. Hatabu H, Kasagi K, Yamamoto K, et al. Acute suppurative thyroiditis associated with piriform sinus fistula: sonographic findings. *Am J Roentgenol* **1990**;155:845-7.
57. Ozaki O, Sugimoto T, Suzuki A, Yashiro T, Ito K, Hosoda Y. Cervical thymic cyst as a cause of acute suppurative thyroiditis. *Jpn J Surg* **1990**;20:593-6.
58. Liem MD. Acute suppurative thyroiditis with progression to abscess. *Semin Roentgenol* **1990**;25:285-6.
59. Marwaha RK, Khanna CM, Gupta RK, Sharma R. Acute suppurative thyroiditis: report of the cases. *J Assoc Physicians India* **1990**;38:297-9.
60. Katz R, Bar-Ziv J, Preminger-Shapiro R, Ben-Tovim R, Rechin Y. Pyogenic thyroiditis due to bronchial pouch sinus. *Isr J Med Sci* **1989**;25:641-4.
61. Szabo SM, Allen DB. Thyroiditis: differentiation of acute suppurative and subacute. Case report and review of the literature [review]. *Clin Pediatr* **1989**;28:171-4.
62. Bernard PJ, Som PM, Urken ML, Lawson W, Biller HF. The CT findings of acute thyroiditis and acute suppurative thyroiditis. *Otolaryngol Head Neck Surg* **1988**;99:489-93.
63. Dewilde D, Van Herreweghe W, Hoskens C. Acute suppurative thyroiditis in a child. *J Belge Radiol* **1988**;71:353-5.
64. Queen JS, Clegg HW, Council JC, Morton D. Acute suppurative thyroiditis caused by *Eikenella corrodens*. *J Pediatr Surg* **1988**;23:359-61.
65. Panamonta O, Watanasupt W, Chaichanasuwat B. Acute suppurative thyroiditis in children. *J Med Assoc Thai* **1988**;71:689-93.
66. Furukawa M, Kano M, Takiguchi T, Umeda R. Piriform sinus fistula as a route of infection in acute suppurative thyroiditis. *Auris Nasus Larynx* **1986**;13:107-12.
67. Smeal WE, Schenfeld LA, Caroff RJ. Acute suppurative thyroiditis in a 3-year-old boy. *Postgrad Med* **1986**;80:100, 105-7.
68. Brenizer AG Jr. Suppurative strumitis caused by *Salmonella typhosa*. *Ann Surg* **1951**;133:247-52.
69. Abe K, Taguchi T, Okuno A, Matsuura N, Sasaki H. Acute suppurative thyroiditis in children. *J Pediatr* **1979**;94:912-4.
70. Gaafar H, El-Garem F. Acute thyroiditis with gas formation. *J Laryngol Otol* **1975**;89:323-7.
71. Takai SI, Miyauchi A, Matsuzuka F, Kuma K, Kosaki G. Internal fistula as a route of infection in acute suppurative thyroiditis. *Lancet* **1979**;1:751-2.
72. Jemerin EE, Aronoff JS. Foreign body in thyroid following perforation of esophagus. *Surgery* **1949**;25:52-9.
73. Higbee D. Acute thyroiditis in relation to deep infections of the neck. *Ann Otol Rhinol Laryngol* **1943**;52:620-7.
74. Sanford JP, Gilbert DN, Moellering RC, Sande MA. The Sanford guide to antimicrobial therapy. 27th ed. Vienna: Antimicrobial Therapy. **1997**: 48.
